# Aripiprazole in the Maintenance Treatment of Bipolar Disorder: A Critical Review of the Evidence and Its Dissemination into the Scientific Literature

Alexander C. Tsai<sup>1</sup>\*, Nicholas Z. Rosenlicht<sup>2</sup>\*, Jon N. Jureidini<sup>3</sup>, Peter I. Parry<sup>4</sup>, Glen I. Spielmans<sup>5</sup>, David Healy<sup>6</sup>

**1** Robert Wood Johnson Health and Society Scholars Program, Harvard University, Cambridge, Massachusetts, United States of America, **2** Department of Psychiatry, University of California at San Francisco and San Francisco Veterans Affairs Medical Center, San Francisco, California, United States of America, **3** Discipline of Psychiatry, University of Adelaide, Adelaide, South Australia, Australia, **4** Child and Adolescent Mental Health Service, Division of Mental Health, Flinders University, Adelaide, South Australia, Australia, **5** Department of Psychology, Metropolitan State University, St. Paul, Minnesota, United States of America, **6** Department of Psychological Medicine, Cardiff University, Cardiff, Wales, United Kingdom

## Abstract

**Background:** Aripiprazole, a second-generation antipsychotic medication, has been increasingly used in the maintenance treatment of bipolar disorder and received approval from the U.S. Food and Drug Administration for this indication in 2005. Given its widespread use, we sought to critically review the evidence supporting the use of aripiprazole in the maintenance treatment of bipolar disorder and examine how that evidence has been disseminated in the scientific literature.

**Methods and Findings:** We systematically searched multiple databases to identify double-blind, randomized controlled trials of aripiprazole for the maintenance treatment of bipolar disorder while excluding other types of studies, such as open-label, acute, and adjunctive studies. We then used a citation search to identify articles that cited these trials and rated the quality of their citations. Our evidence search protocol identified only two publications, both describing the results of a single trial conducted by Keck et al., which met criteria for inclusion in this review. We describe four issues that limit the interpretation of that trial as supporting the use of aripiprazole for bipolar maintenance: (1) insufficient duration to demonstrate maintenance efficacy; (2) limited generalizability due to its enriched sample; (3) possible conflation of iatrogenic adverse effects of abrupt medication discontinuation with beneficial effects of treatment; and (4) a low overall completion rate. Our citation search protocol yielded 80 publications that cited the Keck et al. trial in discussing the use of aripiprazole for bipolar maintenance. Of these, only 24 (30%) mentioned adverse events reported and four (5%) mentioned study limitations.

**Conclusions:** A single trial by Keck et al. represents the entirety of the literature on the use of aripiprazole for the maintenance treatment of bipolar disorder. Although careful review identifies four critical limitations to the trial's interpretation and overall utility, the trial has been uncritically cited in the subsequent scientific literature.

Please see later in the article for the Editors' Summary.

**Citation:** Tsai AC, Rosenlicht NZ, Jureidini JN, Parry PI, Spielmans GI, et al. (2011) Aripiprazole in the Maintenance Treatment of Bipolar Disorder: A Critical Review of the Evidence and Its Dissemination into the Scientific Literature. *PLoS Med* 8(5): e1000434. doi:10.1371/journal.pmed.1000434

**Academic Editor:** Phillipa J. Hay, University of Western Sydney, Australia

**Received:** August 3, 2010; **Accepted:** March 23, 2011; **Published:** May 3, 2011

This is an open-access article, free of all copyright, and may be freely reproduced, distributed, transmitted, modified, built upon, or otherwise used by anyone for any lawful purpose. The work is made available under the Creative Commons CC0 public domain dedication.

**Funding:** The authors received no specific funding for this study. ACT received salary support as a Robert Wood Johnson Health and Society Scholar at Harvard University. No funding bodies had any role in the study design, data collection and analysis, decision to publish, or preparation of the manuscript.

**Competing Interests:** ACT receives salary support through the Robert Wood Johnson Foundation Health and Society Scholars Program. The Robert Wood Johnson Foundation's stated mission is to improve the health and health care of all Americans. NZR is a member of the National Physicians Alliance, a not-for-profit organisation whose stated primary goal is to restore physicians' primary emphasis on the core values of service, integrity, and advocacy. The National Physicians Alliance rejects funding from commercial health care interests and encourages its members to do the same. NZR, JNJ, and PIP are members of Healthy Skepticism, an international not-for-profit organisation whose stated aim is to improve health by reducing harm from misleading drug promotion; GIS joined Healthy Skepticism after this article was accepted for publication. GIS is a current shareholder (<\$10,000) in a mutual fund, Vanguard Healthcare, that invests heavily in pharmaceutical companies. DH reports no links to pharmaceutical companies in the past 5 years. ACT is a former board member of the ethics committee, and former member, of the National Physicians Alliance. ACT and NZR are former members of No Free Lunch, a not-for-profit organisation whose stated mission was to encourage health care providers to practice medicine on the basis of scientific evidence rather than on the basis of pharmaceutical promotion. JNJ was engaged by the law firm of Baum, Hedlund, Aristei & Goldman to provide an independent analysis of the data in Glaxo SmithKline's Study 329 of paroxetine in adolescents. DH has been an expert witness in ten legal cases involving antidepressant medications and one case involving the patent on olanzapine (Zyprexa).

**Abbreviations:** CI, confidence interval; NDA, new drug application.

\* E-mail: nicholas.rosenlicht@ucsf.edu

These authors contributed equally to this work.

## Introduction

First-generation antipsychotic medications have been used for many decades in the short-term treatment of acute manic episodes associated with bipolar disorder [1]. Second-generation antipsychotic medications have increasingly gained popularity for this use as well [2]. However, their promotion for the maintenance treatment of bipolar disorder is a more recent phenomenon [3–6]. In one recently published nationally representative survey of physicians, mood disorders accounted for the majority of antipsychotic medication prescriptions [7], and a recent shift to prescription of antipsychotic medications was observed in a sample of San Diego county Medicaid beneficiaries with bipolar disorder [8].

Traditionally, the clinical care of patients diagnosed with bipolar disorder has been divided into three phases (borrowed from clinical consensus about the phases of treatment for major depressive disorder [9,10]): treatment of acute episodes to symptomatic remission, continuation treatment to prevent relapse, and maintenance treatment to prevent recurrence. The 2 mo following recovery from the acute episode is commonly described as acute phase recovery, and the continuation phase of treatment (during which the natural course of the episode is considered still active even though the patient may be asymptomatic) is defined as lasting from months 2 through 6 [11,12]. The medication used for treatment in the acute phase is often extended for treatment in the continuation and maintenance phases [13,14] and in this context may include lithium, valproate, lamotrigine, or a second-generation antipsychotic medication such as olanzapine, aripiprazole, quetiapine, risperidone, or ziprasidone [15]. However, although the use of second-generation antipsychotic medications to treat acute mania is supported by a relatively well-established evidence base [16–18], efficacy in treatment of acute mania does not necessarily imply efficacy for maintenance or prophylaxis [13,19,20]. As Goodwin and Jamison note: “Simply because a drug has anti-manic properties (and if continued, will protect against relapse back into mania in the months after the acute episode), one cannot assume that it will be effective in the prevention of new episodes. While this assumption may be true (to some extent) for lithium, it is not well supported by the data with respect to all the other antimanic agents” (p. 800) [21].

Despite the need for robust evidence on the maintenance and/or long-term prophylactic treatment of bipolar disorder, to date very little has been supplied in this regard [4,15,22,23]. There remains little consensus about recommended courses of maintenance or prophylactic treatment, and consequently overall psychopharmacological treatment patterns vary widely [24–28]. Aripiprazole, first approved by the U.S. Food and Drug Administration (FDA) for the treatment of schizophrenia in 2002, is the newest of the second-generation antipsychotic medications to have obtained FDA approval for use in bipolar disorder. In 2004 it was approved for the treatment of acute manic and mixed episodes associated with bipolar disorder, and in 2005 it was granted an additional indication for the maintenance treatment of bipolar disorder [29]. Since its approval, aripiprazole has rapidly become a popular choice among clinicians in the maintenance treatment of bipolar disorder. Total U.S. sales for aripiprazole (across all indications) increased from US\$1.5 billion in 2005 to US\$4 billion in 2009 [30]. In a recent study in which U.S.-based physicians were queried about their preferred pharmacological treatments for schizophrenia and bipolar disorder, only 3% of psychiatrists and 7% of primary care physicians named aripiprazole as their first choice for treating schizophrenia,

whereas 23% of psychiatrists and 16% of primary care physicians named aripiprazole as their first choice for treating bipolar disorder [31]. Consistent with this survey, from 2002–2007, the most common indication for the prescription of aripiprazole in office-based practice settings was for bipolar disorder (International Classification of Diseases, Ninth Revision, Clinical Modification [ICD-9-CM] Diagnosis Code 296.0) [32].

In the setting of chronic illnesses such as bipolar disorder, critical appraisal of long-term treatments has important implications for policy making. Overall medication costs for the chronically ill are driven largely by decisions about the ongoing use of prescription medications, rather than by decisions about whether to initiate their use [33]. Spending on prescription medications is the fastest-growing category of the U.S. health care budget [34], further underscoring the need for a rigorous evidence-based approach regarding their prescription and use. Given the rapid adoption and widespread use of aripiprazole in the maintenance treatment of bipolar disorder, we decided to review the scientific data supporting its use in this setting. A secondary aim of this study was to examine the diffusion of this data into the subsequent scientific literature.

## Methods

### Primary Evidence Search

We sought to identify double-blind (i.e., where participants and physicians administering medications were blind to treatment assignment), randomized controlled studies of aripiprazole for the maintenance treatment of bipolar disorder, while also avoiding inadvertent inclusion of acute treatment studies or other study designs. Therefore we required studies to have a duration greater than 4 mo in order to be included in our review, and excluded open-label, acute, and adjunctive studies. We searched for published literature as well as unpublished and ongoing clinical trials, with no language restrictions. The following systematic search strategy was employed to search PubMed: “bipolar disorder”[MeSH Terms] OR (“bipolar”[All Fields] AND “disorder”[All Fields]) OR (“bipolar disorder”[All Fields]) AND (“aripiprazole”[Substance Name] OR “aripiprazole”[All Fields]) AND (“maintenance”[MeSH Terms] OR “maintenance”[All Fields]). We also searched Scopus (including Embase and MEDLINE) using the same search terms (“bipolar disorder” OR “bipolar” AND “disorder” AND “aripiprazole” AND “maintenance”). We also searched ClinicalTrials.gov, the Cochrane Central Register of Controlled Trials (Issue 3 of 4, July 2010), and the World Health Organization International Clinical Trials Registry Platform Search Portal using the terms “aripiprazole” and “bipolar.” We did not attempt to contact the manufacturer directly to inquire about possibly unpublished trials, but we screened all listings on the Bristol-Myers Squibb Clinical Trials Disclosure Web site under Clinical Trial Results, Psychiatric Disorders [35]. All searches were conducted in July 2010. And finally, we submitted a request under the U.S. Freedom of Information Act [36] for the supplemental New Drug Application (NDA) filed by the study sponsor to obtain additional labeling for the use of aripiprazole as maintenance therapy in bipolar I disorder [29], and we searched it manually for further reference to other published or unpublished studies.

### Citation Search

We also sought to better understand the influence of the primary evidence on the broader scientific literature. To do this, we used the Web of Science(R) Science Citation Index Expanded

to search for articles that cited the primary evidence identified through the evidence search protocol detailed above. Next, we evaluated the articles on how they cited the primary evidence, using criteria similar to those used in a previous study on the quality of news media reports of medication trials [37]. Each of the citing articles was rated on three quality criteria by a single study author (NZR). A 15% random sample of articles ( $n=15$ ) was double-coded independently by another study author (ACT), and the Cohen's kappa coefficient was calculated in order to assess the degree of inter-rater agreement [38]. We chose dichotomous quality ratings to provide conservative estimates of citation quality and in order to limit subjective judgments by the rater. First, articles were screened for any mention of the use of aripiprazole specifically for ongoing, maintenance, or prophylactic treatment of bipolar disorder. If the answer to this question was "yes," then the article was further rated on the three quality criteria: (1) whether the article reported any quantitative data from the primary evidence (e.g., odds ratios, percentages, or  $p$ -values); (2) whether the article mentioned any adverse events described in the primary evidence; and (3) whether the article mentioned any limitations of the primary evidence.

Although our citation search protocol was not specifically targeted towards identifying treatment guidelines and review articles on pharmacological treatment strategies in bipolar disorder, we manually highlighted for further discussion those that were identified in the citation search. Our citation search protocol likely underestimates the influence of the primary evidence because we did not also use a database such as Google

Scholar that could have also identified guidelines implemented by hospitals, government, or other institutions whose documents in this area have not been published in peer-reviewed journals or indexed in services such as PubMed. However, we chose to highlight treatment guidelines and reviews because they can be particularly influential in shaping prescribing behavior.

## Results

Our primary evidence search protocol identified 177 unique citations (Figure 1). Of these 177 citations, only two publications met criteria for inclusion in our review [39,40]. Searching the clinical trials registries yielded two listings meeting inclusion criteria, but these referred to the two publications already identified (Figure 2) [39,40]. Further details on the excluded acute and adjunctive studies are provided in Tables S1 and S2. Two unpublished trials initially appeared to meet criteria for inclusion but were ultimately excluded. The first, Otsuka NCT00606177 [41], was a 3-wk placebo-controlled trial of aripiprazole for treatment of acute mania with a 22-wk extension phase, but it was described as currently still recruiting study participants. The second, BMS CN138-135LT [42], was a completed 40-wk extension of a 12-wk randomized lithium- and placebo-controlled trial of aripiprazole for acute mania. Although the 12-wk acute outcomes data from BMS CN138-135 were published in a peer-reviewed journal [43], the outcomes data from the 40-wk extension have not, to our knowledge, been published (and the little data made available in the synopsis posted online by the

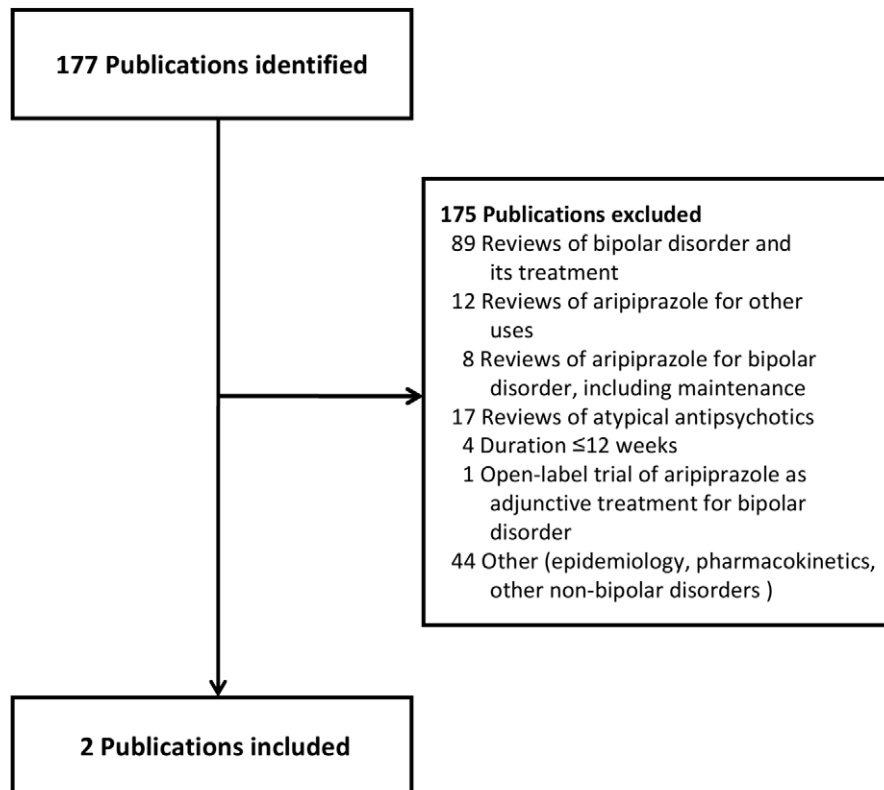

**Figure 1. Publications identified for review.** These publications were identified using a systematic search of PubMed and Scopus, as well as a manual search of the supplemental new drug application submitted to the FDA to obtain an additional indication for the use of aripiprazole in the maintenance treatment of bipolar disorder. doi:10.1371/journal.pmed.1000434.g001

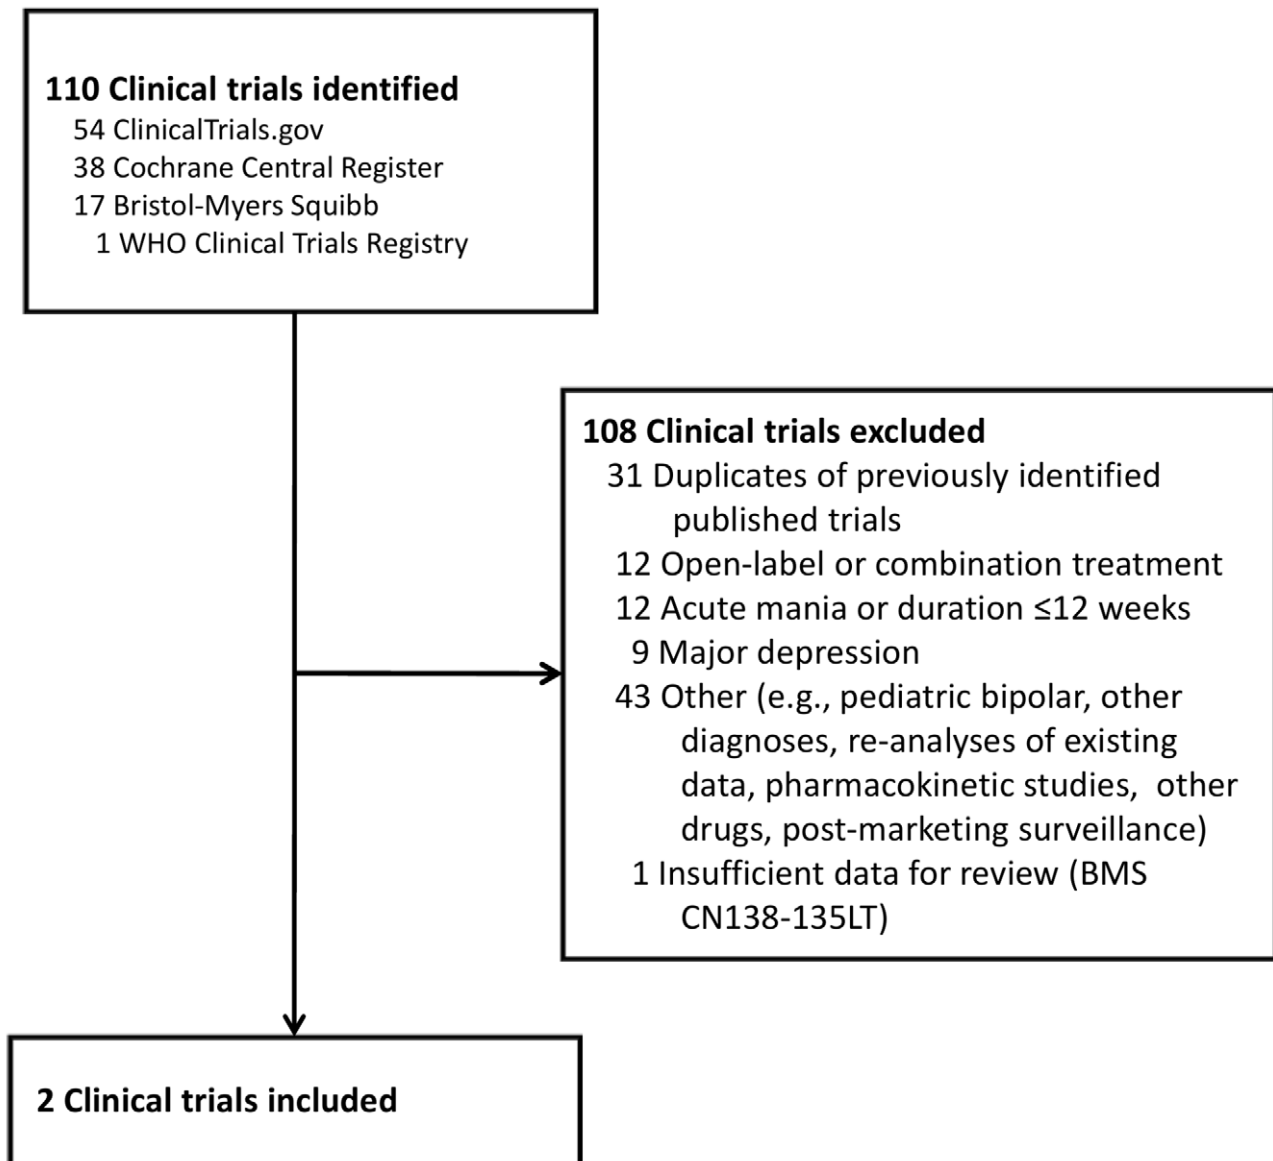

**Figure 2. Clinical trials identified for review.** These clinical trials were identified using a systematic search of ClinicalTrials.gov, the Cochrane Central Register of Controlled Trials, the World Health Organization (WHO) International Clinical Trials Registry, and the Bristol-Myers Squibb Clinical Trials Disclosure Web site, as well as a manual search of the supplemental new drug application submitted to the FDA to obtain an additional indication for the use of aripiprazole in the maintenance treatment of bipolar disorder. The “duplicates” were each matched to published studies (see Figure 1). doi:10.1371/journal.pmed.1000434.g002

manufacturer were inadequate for detailed critical assessment). The manufacturer’s synopsis indicates that 4.5% of participants on aripiprazole completed the extension phase, compared to 8.1% for those on lithium. A third arm of the study, completed by 8.5% of participants, entailed treatment with placebo for 3 wk followed by crossover to aripiprazole. Finally, the supplemental NDA contained no references to additional studies, published or unpublished, meeting inclusion criteria (Text S1) [29].

The two peer-reviewed publications included in our review report the results of a single randomized trial (hereafter referred to as “the Keck trial”) implemented under the auspices of the Aripiprazole Study Group and sponsored by the manufacturer of the drug, Bristol-Myers Squibb Co. One publication describes the initial

26-wk double-blind phase [39], and the other its 74-wk extension [40]. We also identified a post hoc subgroup analysis of data from the Keck trial focused on participants diagnosed with the rapid-cycling variant of bipolar disorder [44]. We also identified a separate trial [45], also authored by Keck and colleagues, examining the efficacy of aripiprazole in the treatment of acute manic episodes, with outcomes assessed at 3 wk. Given the paucity of available evidence on aripiprazole for the maintenance treatment of bipolar disorder, we decided to review the Keck trial [39,40] in detail.

#### The Keck Trial

A total of 633 adult participants meeting DSM-IV criteria for bipolar I disorder were enrolled in the Keck trial. A flow chart of

the trial is shown in Figure 3. For inclusion, participants must either have completed a prior 3-wk acute mania trial [45], met eligibility criteria for a prior acute mania trial but declined participation in that trial, or experienced a manic or mixed episode within the prior 3 mo. The publication describing the 26-wk double-blind phase [39] indicates that participants were recruited from 76 sites in the U.S., Mexico, and Argentina (but does not specify the numbers of sites within each country or the numbers of patients from each site). Of the original enrollees, 567 entered the “stabilization phase,” which consisted of open-label treatment with aripiprazole for 6–18 wk. Participants remained in this phase until their Young Mania Rating Scale (YMRS) was  $\leq 10$  and their Montgomery-Asberg Depression Rating Scale (MADRS) was  $\leq 13$  during four consecutive visits over a minimum of 6 wk. 206 participants completed the stabilization phase. Of these, 161 entered the double-blind phase. The supplemental NDA indicates that participants who completed the stabilization phase and entered randomization were derived from 45 sites in the U.S. ( $n = 124$ ), three sites in Argentina ( $n = 7$ ), and two sites in Mexico ( $n = 30$ ). These 161 participants were assigned either to an intervention arm in which they continued taking aripiprazole at the stabilizing dose ( $n = 77$  or 78; both numbers are reported [40]) or to a placebo arm in which aripiprazole was abruptly discontinued and replaced with placebo ( $n = 83$ ). 39 (50% of the 77 or 78 who entered randomization) in the intervention arm and 28 participants (34%) in the placebo arm completed the 26-wk

double-blind phase. Time to relapse was described as longer for participants treated with aripiprazole compared to those who were switched to placebo. Mean times to relapse were not provided, but the hazard ratio for relapse was given as 0.52 (95% confidence interval [CI] 0.30–0.91). When time to relapse was partitioned into manic versus depressive relapse, the difference in overall time to relapse was found to be driven primarily by an effect on manic relapse (23% relapse rate on placebo versus 8% relapse rate on aripiprazole). No differences in time to depressive relapse (13% versus 12%) or to mixed state relapse (6% versus 5%) were noted. Keck and colleagues concluded that aripiprazole “was superior to placebo in maintaining efficacy in patients with bipolar I disorder with a recent manic or mixed episode who were stabilized and maintained on aripiprazole treatment for 6 weeks” (p. 626) [39].

The extension phase of the Keck trial, published as a separate paper [40], followed the remaining participants over the subsequent 74 wk: 27 participants in the placebo group (of the 28 who completed the double-blind phase) and 39 participants in the aripiprazole group. The authors concluded: “Over a 100-week treatment period, aripiprazole monotherapy was effective for relapse prevention in patients who were initially stabilized on aripiprazole for 6 consecutive weeks, and it maintained a good safety and tolerability profile” (p. 1480) [40]. Similar to the data from the first 26 wk, time to manic relapse was reported to be longer for the aripiprazole group (with no difference between groups in time to depressive relapse).

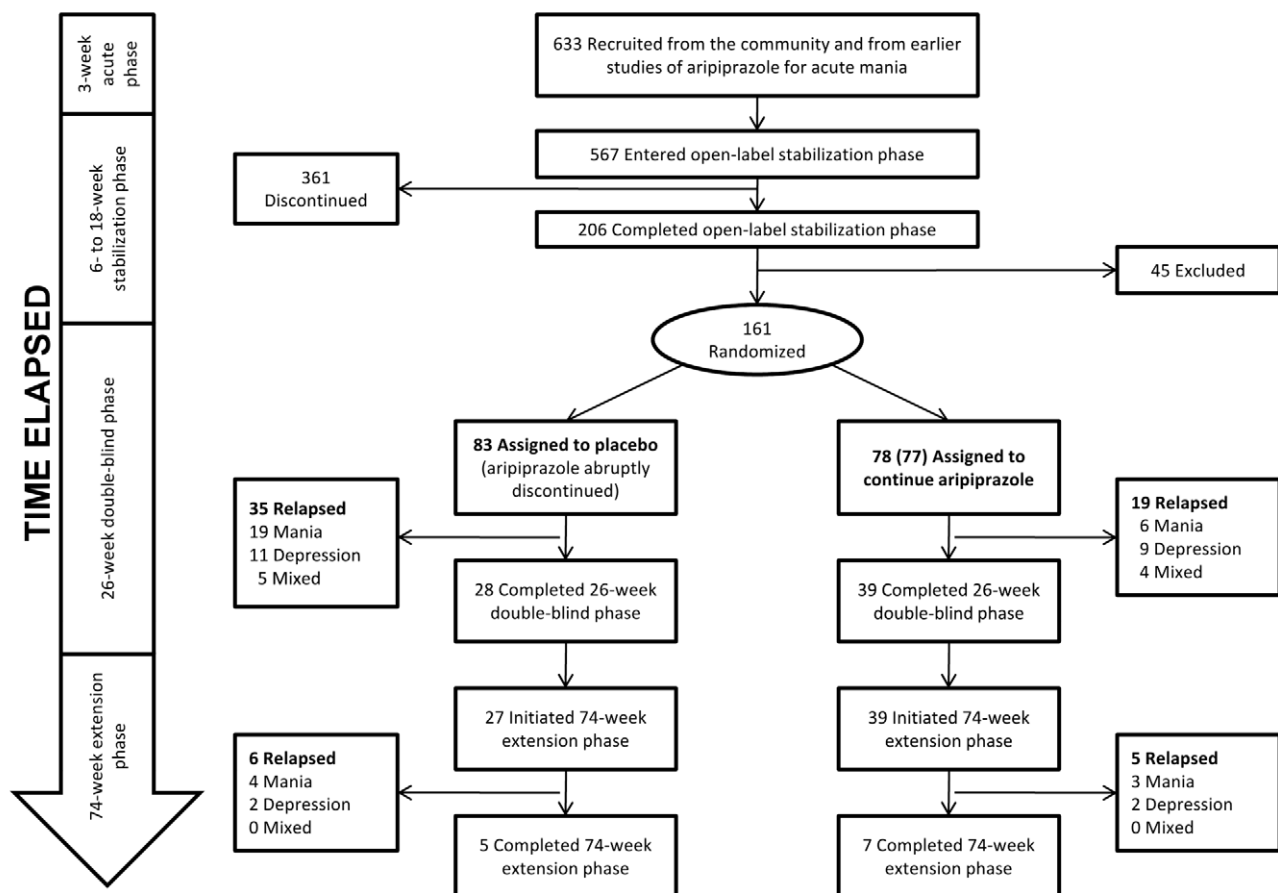

**Figure 3. Keck study participant flow.** Participants had to complete the 6- to 18-wk stabilization phase before they were eligible for randomization. After completion of the 26-wk double-blind phase, participants were invited to continue in the 74-wk extension phase. doi:10.1371/journal.pmed.1000434.g003

#### Four Substantive Criticisms of the Keck Trial

Although the Keck trial was the sole basis for aripiprazole receiving an additional FDA-approved indication for the maintenance treatment of bipolar disorder [29], we believe that reading the Keck trial as supporting the use of aripiprazole for this indication is an overinterpretation of the trial's design and the data it generated. First, the duration of the Keck trial was insufficient to demonstrate prophylactic efficacy. Second, the double-blind phase of the Keck trial was based on an enriched sample of patients who had already responded to the medication during the stabilization phase, thereby limiting generalizability of the trial's findings. Third, the randomized discontinuation design of the Keck trial may conflate iatrogenic adverse effects of abrupt medication discontinuation with the beneficial effects of short-term continuation treatment. All of the putative benefit occurred during the double-blind phase of the trial, and little improvement was gained during the extension phase. And finally, the overall completion rate was 1.3%, requiring unrealistic extrapolation to draw meaningful conclusions. Keck et al. [39,40] mention lack of generalizability as a potential limitation of the enrichment design, but they do not discuss how these other limitations may have compromised the trial's internal validity.

The FDA's review of the Keck trial identified other substantive concerns, including the fact that the *p*-value for the primary analysis changed from 0.02 to 0.10 when the statistical reviewer excluded data from one of the trial's two Mexican sites (where the relapse rate among participants in the aripiprazole arm was lower than the other trial sites) [46]. While of general concern, this and other issues identified by the FDA are unrelated to our methodological critiques. All of these factors undercut even a cautious interpretation of the Keck trial as supporting the use of aripiprazole for maintenance treatment of bipolar disorder. Below we review each of these criticisms in detail.

**Insufficient duration to demonstrate prophylactic efficacy.** In the open-label phase of the Keck trial, stability was defined by whether or not a participant maintained YMRS and MADRS scores in the asymptomatic range for at least 6 consecutive weeks. To meet this criterion, on average the trial participants spent 89 d in the stabilization phase. Comparing their own work to other randomized discontinuation studies of maintenance treatment in bipolar disorder that required a shorter duration of stability [47–49], Keck et al. describe their stability criterion as “the most stringent criteria to date to define stability” (p. 634) [39]. Intervention-arm participants who had achieved stability on aripiprazole were then assigned to continue with aripiprazole, and placebo-arm participants abruptly switched to placebo, for the following 26 wk.

Contrary to the authors' claims, we argue here that, given the natural history of bipolar disorder, the design of the Keck trial was unsuitable for evaluating the efficacy of aripiprazole in the maintenance treatment of bipolar disorder. The episodic nature of recurrent mania and depression require investigators to randomize, enroll, and retain patients for a duration sufficient to demonstrate maintenance and/or prophylactic efficacy. While there is high interindividual variation, the median length of untreated episodes has been reported to vary from 3–6 mo in clinical trial settings and from 2–3 mo in epidemiological studies [50], with depressive episodes typically lasting longer than manic episodes [21,51]. Thus, even if one does not accept the other methodological concerns we describe in this paper, the Keck trial, with its stabilization criterion of 6 wk, could at best be used to demonstrate a short-term benefit of continuation treatment in preventing relapse of symptoms attributable to an ongoing acute episode [52]. Demonstration of maintenance efficacy in preventing

recurrence of mood episodes would require benefit to be shown at least 6 mo after the acute phase. 6 mo has been traditionally recognized as the point at which continuation treatment becomes maintenance treatment [10,11,12,52–54]. Appropriately, the clinical review contained in the supplemental NDA describes a meeting with the study's sponsors in which the FDA's Division of Neuropharmacological Drug Products “expressed that the duration of the open-label stabilization phase defines duration of effect and noted that an optimal study design would include a six month open-label stabilization phase and randomized withdrawal of patient subgroups at specified timepoints” (p. 9) [55]. The leading textbook in the field suggests an even more stringent threshold study duration: “Because the natural history of bipolar disorder is for it to recur, on average, every 16–18 months, true prophylaxis cannot be evaluated in 6 or 12 months” (p. 801) [21]. Although somewhat controversial, the idea that demonstration of true prophylactic efficacy requires a study duration longer than that which has been typically utilized has been supported by other leading researchers as well [11,52,56].

**Limited generalizability due to the enriched sample.** Only participants who had responded to aripiprazole in the stabilization phase of the trial were included in the double-blind phase of the trial. Of the 567 participants who entered the stabilization phase, only 206 completed it. Some of the randomized participants received unblinded medication and were therefore discontinued [29], so the double-blind efficacy dataset consisted of 161 participants. This means that 361 of the 567 (74%) participants who entered the stabilization phase but dropped out were excluded from randomization because of adverse events, lack of efficacy, withdrawal of consent, and other reasons as detailed in the publication—leaving behind a selected group of participants who had responded favorably to aripiprazole in the stabilization phase to be subsequently randomized. This design could have the effect of biasing the trial's findings away from the null [57], and, even in the absence of such bias, the results from this enriched sample cannot be generalized to the majority of persons diagnosed with bipolar disorder. This limitation of the randomized discontinuation design has long been recognized by drug trialists [11,12,56,58–65] and is not dissimilar to criticisms voiced about the first generation of randomized trials evaluating the use of lithium for maintenance treatment in bipolar disorder, i.e., that those study designs selected preferentially for lithium-responsive variants of the disorder [66,67].

**Possible conflation of iatrogenic effects with beneficial effects.** The randomized discontinuation study design could explain the putatively positive findings on preventing relapse even in the absence of a true drug effect. In the Keck trial, the randomization sample was enriched with participants who had already responded to aripiprazole in the stabilization phase and were therefore more likely to experience an iatrogenic relapse of symptoms when aripiprazole was abruptly discontinued in the double-blind phase. Abrupt discontinuation, or even abrupt partial removal, of a drug used for maintenance has long been known to provoke relapse in patients diagnosed with bipolar disorder [68–77]. This “bipolar rebound phenomenon” has been most often described for lithium, but it has also been observed in the setting of abruptly withdrawn antiepileptic [78], antipsychotic [3,12,48,56, 78–80], and antidepressant medications [59,75,78,81] administered to persons diagnosed with other mood and psychotic disorders. For this reason, Geddes et al. specifically excluded studies with a randomized discontinuation design from their systematic review and meta-analysis of the long-term use of lithium in the treatment of bipolar disorder [82].

Thus, if aripiprazole had no effect on preventing relapse, the Keck trial might still be expected to show a higher relapse rate early in the double-blind phase among participants assigned to the placebo arm (compared to those assigned to the intervention arm), and then similar relapse rates between study arms during the extension phase. This particular design element appears to have substantially influenced the outcome of the Keck trial, as is evident from a comparison of data from the 26-wk double-blind phase with data from the 74-wk extension phase. During the 26-wk double-blind phase, 19 out of 83 participants (23%) in the placebo arm experienced a manic relapse, whereas only four (5%) did so in the subsequent 74-wk extension phase.

When relapse data from the 74-wk extension phase are examined separately from those from the first 26 wk (Figure 3), only four participants in the placebo arm experienced a relapse to mania, compared to 3 participants in the intervention arm (4.8% versus 3.8%). This information is not explicitly presented in either paper and can only be discerned by comparing the papers side by side and calculating the differences by hand. Figure 4 in the 74-wk extension phase publication (p. 1486) [40] shows that 28% of participants in the placebo arm relapsed to mania over 100 wk of follow up. Given  $n=83$  in the placebo arm, this suggests 23 participants in the placebo arm relapsed to mania over 100 wk of follow up. Because 19 participants in the placebo arm relapsed to mania in the first 26 wk (Figure 5 in the 26-wk double-blind phase publication [p. 531] [39]), this means four participants relapsed to mania during the 74-wk extension phase. We employed similar reasoning to calculate the number of participants who relapsed to mania in the intervention arm, as well as the number of

participants who relapsed to depressive and mixed states. Similar patterns are observed for relapse to depression and relapse to mixed state for the placebo and aripiprazole arms. Thus, virtually all of the reported placebo-aripiprazole difference in relapse occurred during the first 26 wk of the trial.

**Limitations of the low completion rate.** Only seven of 39 (18%) aripiprazole-treated participants and five of 27 (19%) placebo-treated participants completed the 74-wk extension phase. The low completion rate in the treatment arm is especially striking given that only participants who had proven to be responders in the initial stabilization phase were included in the double-blind and extension phases and that the placebo group matched the aripiprazole group in terms of trial completion. Out of the 633 participants who entered the trial, after excluding the 83 who were switched to placebo, only seven aripiprazole-treated participants completed the 100-wk trial, for a completion rate among aripiprazole-treated participants of less than 1.3%. This is not explicitly noted anywhere in the paper [40]. Keck et al. [40] acknowledge that only 12 participants completed the trial, but the smaller denominator used for comparison is the number of participants who entered the 74-wk extension phase rather than all participants who entered the trial.

We argue that drawing meaningful conclusions from a trial with an overall completion rate of less than 1.3% is an inappropriate undertaking. The completion rate substantially limits generalizability of the trial's findings, as trial completers very likely were dissimilar to the enrolled and/or randomized participant pools. The meaningful differences between completers and noncompleters were demonstrated in a randomized trial of divalproex versus

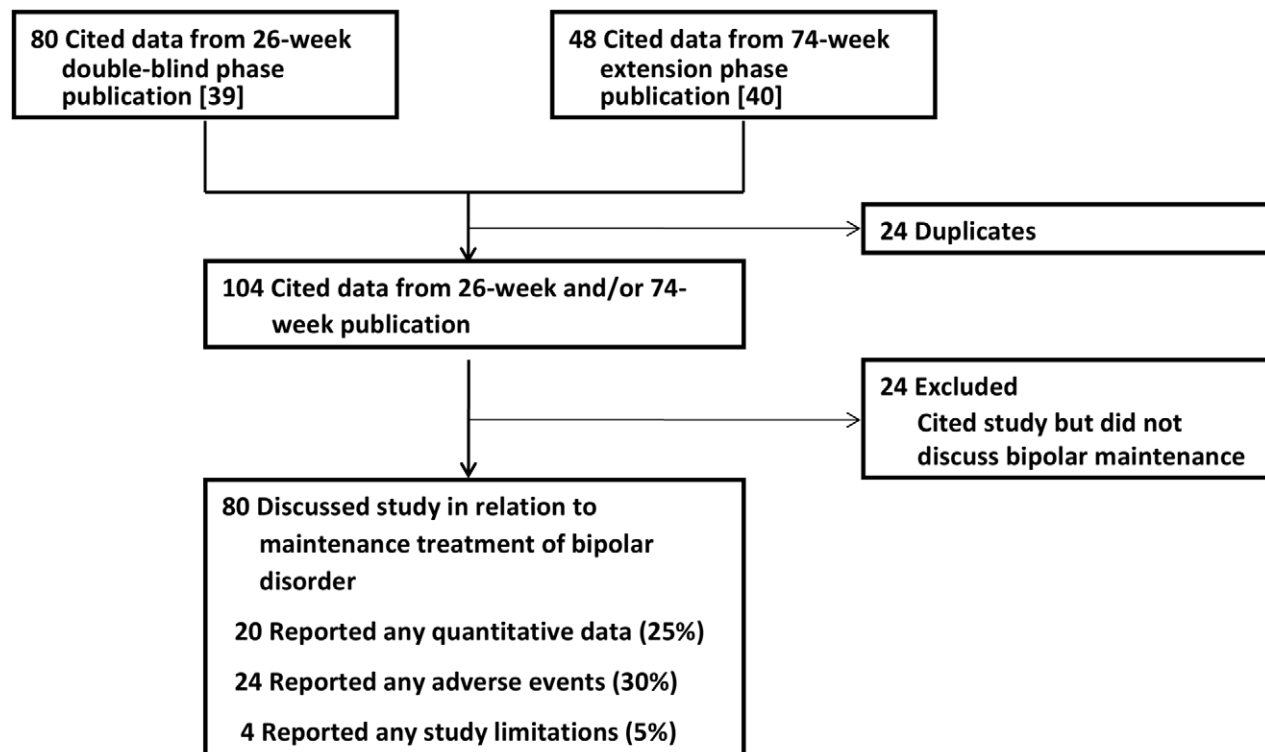

**Figure 4. Publications citing the Keck study.** These publications were identified using Web of Science(R) Science Citation Index Expanded. Those that discussed the Keck study in relation to the maintenance treatment of bipolar disorder were evaluated on three quality indicators, as shown.

doi:10.1371/journal.pmed.1000434.g004

lithium for relapse prevention in bipolar disorder [83]: participants who completed the trial had milder symptoms at baseline and a less severe lifetime illness course [84]. Keck et al. identify the low completion rate in the extension phase as a potential limitation but appeal to the low completion rates observed in other maintenance trials [47,48] to support the generalizability of their results. In contrast, we view the similar completion rates observed in other long-term studies as similarly raising concerns about how to draw inferences from these trials to inform routine clinical practice. Still, we observe that other investigators have successfully implemented long-term studies in this patient population with greater rates of completion: for example, earlier studies of lithium in the treatment of affective disorders demonstrated completion rates of 92.9% (26/28) [85] and 73.2% (74/101) [86] among lithium-treated participants.

### Impact of the Keck Trial on the Literature

Our citation search protocol identified 80 articles that cited the results from the 26-wk double-blind phase [39] and 48 articles that cited the results of the 74-wk extension phase [40]. After eliminating duplicates, the two publications from the Keck trial garnered 104 subsequent citations in total. Of these citing articles, 24 did not contain any mention of the Keck trial in relation to long-term or maintenance treatment of bipolar disorder and were excluded from further analysis (Figure 4). Double-coding revealed a high degree of inter-rater agreement on the quality assessment measures. There was 100% agreement on whether the publications were classified as mentioning aripiprazole for maintenance treatment. Among the double-coded publications mentioning maintenance treatment, there was 100% agreement on whether quantitative data and limitations were mentioned. There was one disagreement about whether adverse events were mentioned, yielding a kappa coefficient of 0.75 (95% CI 0.05–0.95). The overall kappa coefficient was 0.95 (95% CI 0.73–0.99).

Of the 80 articles that cited the Keck trial in reference to maintenance treatment of bipolar disorder, only 20 (25%) presented any quantitative data from the Keck trial; the remainder reported qualitative statements only (e.g., “Aripiprazole significantly delayed the time to relapse into a new mood episode in patients with bipolar I disorder over both 26 and 100 weeks of treatment.” [87]). 24 publications (30%) mentioned any of the adverse events reported in the trial. Only four (5%) made any mention of study limitations.

Among the articles identified through our citation search protocol were eight literature reviews [88–95] and three bipolar treatment guidelines [15,96,97] that specifically discussed the use of aripiprazole in the treatment of bipolar disorder. Because review articles and treatment guidelines can be particularly influential in shaping policy and prescribing behavior, we chose to highlight these in our discussion (Table 1). The evidence summaries employed the methodologies of consensus panel ( $n = 3$ ), narrative review ( $n = 6$ ), or systematic review ( $n = 2$ ). Ten of the 11 reviews and treatment guidelines contained a financial disclosure related to Bristol-Myers Squibb.

Overall, the eight reviews were favorable in their assessment as to the putative efficacy of aripiprazole in the maintenance treatment of bipolar disorder. Solely on the basis of the results of the Keck trial, the Texas Medication Algorithm Project update listed aripiprazole as having “level 2” evidence (out of five levels of quality, with level 1 being the highest-quality) for maintenance treatment of bipolar disorder [15]. The Canadian Network for Mood and Anxiety Treatments and International Society for Bipolar Disorders recommended aripiprazole as first-line maintenance treatment of bipolar disorder, although it is noted that this is

“mainly for preventing mania” (p. 235) [96]. This treatment recommendation was based on the Keck trial, along with a 30-wk pediatric bipolar trial that has only been published in abstract form [98]. The British Association for Psychopharmacology (BAP) based its positive endorsement of aripiprazole for relapse prevention solely on the Keck trial [97]. Contrary to the criticisms we described earlier, the BAP guidelines note, “Acute withdrawal of the active agent did not produce an excess of early relapse in this study” (p. 26).

### Discussion

Our evaluation of the evidence base supporting the use of aripiprazole for the maintenance treatment of bipolar disorder reveals that the justification for this practice relies on the results from a single trial by Keck and colleagues published in two peer-reviewed journal articles [39,40]. The methodology and reporting of the Keck trial are such that the results cannot be generalized to inform the treatment of most patients with bipolar disorder. Published interpretations of the data notwithstanding, in our opinion the Keck trial does not provide data to support the use of aripiprazole in the maintenance treatment of bipolar disorder. This lack of robust evidence of benefit should be weighed against the potential for long-term harms that have been described with other antipsychotic medications [3] and adverse events related to aripiprazole use, including tremor, akathisia, and significant weight gain [39]. Our concern about the critical imitations in this trial is further accentuated by the apparent widespread use of aripiprazole as a first-line agent for the maintenance treatment of bipolar disorder [31,32].

Although we appreciate that the unique clinical features of bipolar disorder make controlled study extremely difficult [67,84,99–103], many of the weaknesses we document stem from the use of the randomized discontinuation design. Further study is needed in order to determine whether the problems described in this particular case are also more widely applicable to other continuation or maintenance treatment studies in bipolar disorder. We find unpersuasive the argument that a randomized discontinuation study such as this is valuable because it reflects common clinical practice [104,105]. The two-arm, parallel randomized controlled trial may yield information that is more clinically useful than the discontinuation design. Under the parallel design, data from all participants (not just those who demonstrated an acute response) would contribute to our understanding of the drug’s short- and long-term efficacy: one of two medications (or placebo) would be given to participants in the acute phase, and they would be followed throughout the continuation and maintenance phases (and beyond) to document response to treatment. (This study design, as well as the other study designs we describe, clearly could be used to study nonpharmacological treatments, including evidence-based psychotherapies. However, because this paper has emphasized discussion about pharmacologic treatments, we use the phrase “medication” for simplicity.) A two-arm, parallel randomized controlled trial of sufficient duration would directly answer the substantive research question, “Does aripiprazole treat symptoms to remission and prevent recurrent episodes when given to patients diagnosed with bipolar disorder presenting in a manic or mixed state?” This is clearly different from the question answered by the discontinuation design, “Among patients diagnosed with bipolar presenting in a manic or mixed state who have achieved a reasonable symptomatic improvement after being given aripiprazole, should aripiprazole be continued to maintain the initial improvement?” [106].



**Table 1.** Treatment guidelines and reviews of aripiprazole for the treatment of bipolar disorder.

| Author, Year, Country               | Financial Disclosure Related to Bristol-Myers Squibb | Methods           | Quality Indicators <sup>a</sup> |     |     | Narrative Recommendation                                                                                                                                                                                                                                                                                                                    |
|-------------------------------------|------------------------------------------------------|-------------------|---------------------------------|-----|-----|---------------------------------------------------------------------------------------------------------------------------------------------------------------------------------------------------------------------------------------------------------------------------------------------------------------------------------------------|
|                                     |                                                      |                   | A                               | B   | C   |                                                                                                                                                                                                                                                                                                                                             |
| Goodwin, 2009, Great Britain [97]   | Yes                                                  | Consensus panel   | No                              | No  | No  | "Aripiprazole was more effective than placebo after acute and continuation treatment of mania with aripiprazole: no effect on depression was discernable. Acute withdrawal of the active agent did not produce an excess of early relapse in this study." <b>(positive)</b>                                                                 |
| Yatham, 2009, Canada [96]           | Yes                                                  | Consensus panel   | No                              | No  | No  | "Given that efficacy was shown primarily for mania, aripiprazole is included as a first-line maintenance treatment for bipolar disorder for the treatment and prevention of mania." <b>(positive)</b>                                                                                                                                       |
| Suppes, 2005, United States [15]    | Yes                                                  | Consensus panel   | No                              | No  | No  | "Aripiprazole is recommended based on a randomized, double-blind, placebo-controlled, 6-month maintenance study in which patients received open-label aripiprazole until stable, then were randomized to either placebo or aripiprazole for the 6-month follow-up." <b>(positive)</b>                                                       |
| Garcia-Amador, 2006, Spain [93]     | Yes                                                  | Narrative review  | Yes                             | Yes | No  | "These data support the decision by the US FDA to approve aripiprazole for the maintenance treatment of bipolar patients, beyond the treatment of acute mania." <b>(positive)</b>                                                                                                                                                           |
| McIntyre, 2007, Canada [91]         | Yes                                                  | Narrative review  | Yes                             | Yes | No  | "Aripiprazole is established as being efficacious in acute mania and for the prevention of manic relapse in BD. Aripiprazole efficacy is confirmed on primary and secondary efficacy parameters." <b>(positive)</b>                                                                                                                         |
| Fagiolini, 2008, United States [94] | Yes                                                  | Narrative review  | Yes                             | Yes | No  | "This 100-week study showed a significantly longer time to relapse with aripiprazole when compared with placebo." <b>(positive)</b>                                                                                                                                                                                                         |
| McIntyre, 2007, Canada [90]         | Yes                                                  | Narrative review  | Yes                             | Yes | No  | "A single, randomized, double-blind, parallel group, placebo-controlled study reported on the safety and efficacy of aripiprazole in preventing relapse of a mood episode in recently manic or mixed episode patients with bipolar I disorder." <b>(positive)</b>                                                                           |
| Ulusahin, 2008, Turkey [95]         | None disclosed                                       | Narrative review  | Yes                             | Yes | No  | "One double-blind, randomized, placebo controlled clinical trial of 100-week aripiprazole monotherapy, which is the longest clinical trial among the trials conducted in bipolar disorder among the second-generation antipsychotics, showed that aripiprazole was effective for relapse prevention in bipolar patients." <b>(positive)</b> |
| Muzina, 2009, United States [89]    | Yes                                                  | Narrative review  | Yes                             | Yes | No  | "The results from a 100-week study of aripiprazole for the prevention of bipolar I episodes represent the longest maintenance study since early lithium trials and support the use of aripiprazole as maintenance treatment, primarily against manic relapses." <b>(positive)</b>                                                           |
| Fountoulakis, 2009, Greece [88]     | Yes                                                  | Systematic review | Yes                             | Yes | Yes | "Recent reviews suggest that aripiprazole is efficacious in acute mania and in the maintenance treatment of bipolar disorder, with a favourable safety and tolerability profile, with minimal propensity for clinically significant weight gain and metabolic disruption." <b>(positive)</b>                                                |
| McIntyre, 2010, Canada [92]         | Yes                                                  | Systematic review | Yes                             | Yes | Yes | "The available evidence supports the efficacy and tolerability of aripiprazole in the maintenance treatment of bipolar disorder." <b>(positive)</b>                                                                                                                                                                                         |

<sup>a</sup>A, reported any quantitative data; B, reported any adverse events; C, reported any study limitations.

BD, bipolar disorder.

doi:10.1371/journal.pmed.1000434.t001

The primary disadvantage of the parallel design is that a greater proportion of (acutely ill) study participants would be subjected to placebo for the full duration of the trial, exactly the ethical issue that the discontinuation design was intended to address [107,108]. Keck et al. [39] stated that they sought to minimize the extent to which stabilized participants were administered placebo. Yet their study could have been modified to diminish its exposure to the weaknesses that we have described above. First, the duration of stability required prior to randomization could be lengthened.

One likely cost of this design modification is that the proportion of participants actually randomized would decrease further [109]. A second modification would be to gradually taper the discontinuation of medication among participants randomized to receive placebo. In previously published randomized discontinuation studies, medications administered during the open-label phase were tapered over a period of 2 to 3 wk rather than abruptly discontinued [47,83]. Greenhouse et al. [59] suggest implementing the taper over several months.

Aside from these modifications to the parallel design, other alternatives have been suggested. Greenhouse et al. [59] proposed an alternative randomization scheme in which study participants are randomized to one of six treatment strategies. In the acute phase of treatment, study participants would receive one of two medications. In the maintenance phase of treatment, study participants would either remain on the medication initiated during the acute phase, be switched (gradually) to the alternative medication, or be switched (gradually) to placebo. This innovative study design would address the substantive research question, “Which treatment strategy is better in controlling and preventing the recurrence of depression?” (p. 318) [59]. A pure prophylactic design has also been recommended [10,12,100], in which patients previously diagnosed with a recurrent mood disorder would be enrolled during a medication-free remission period. Then, while participants are in remission, they would be offered one of two medications (or placebo). All participants would be followed in the study for a prespecified duration, and the treatment arms would be compared in terms of time to recurrence of a mood episode. This design would avoid the previously described error of possibly conflating beneficial treatment effects with iatrogenic adverse effects of abrupt medication discontinuation. However, as noted by Goodwin, Whitman, and Ghaemi [12], the failure of the divalproex study by Bowden et al. [83] was partly attributed to its enrollment of participants with low severity of illness [84]—and it was the last study to utilize the lithium-era prophylaxis design.

We recognize that the proposed study designs will be regarded by some as too costly or infeasible. Although some have suggested that a study with selected limitations may be useful in guiding clinical practice [104], we would disagree with this argument. The current “anti-Hippocratic” state of psychopharmacological practice described by Ghaemi [56,110] raises questions about the extent to which research with substantive limitations is appropriately interpreted with conservative sensibilities. These concerns are borne out in our data. Thomson Reuters Essential Science Indicators (SM) places the 26-wk double-blind phase publication in the top 1%, and the 74-wk extension phase publication in the top 1%–2%, of papers published in the fields of psychiatry and psychology. Thus, by our conservative estimates, the Keck trial could be regarded as relatively influential. More importantly, we found that the Keck trial was cited uncritically by a subsequent generation of authors, through treatment guidelines, reviews, and other publications. All failed to note the consequences of abrupt and premature discontinuation of antimanic medication, especially during the vulnerable continuation period. The uncritical manner in which the Keck trial has been cited is reminiscent of the “echo chamber” effect described by Carey et al. [111] in their assessment of the now-discredited use of gabapentin in the treatment of bipolar disorder. Although the analogy is somewhat limited as there were no reportedly positive double-blind trials examining the use of gabapentin for this indication, we document a similar pattern of uncritical citations of the primary evidence regarding aripiprazole in the maintenance treatment of bipolar disorder.

Of further concern regarding the uncritical citation of the Keck trial’s claims is that ten of the 11 treatment guidelines and review articles in our sample contained a financial disclosure related to the drug’s manufacturer, Bristol-Myers Squibb Co. Financial conflicts of interest are highly prevalent across a wide range of medical subfields [112], and while they are known to be associated with recommendations in review articles [113], there is no

systematic research documenting their influence on clinical practice guideline recommendations [114]. However, financial conflicts of interest have been found to be associated with biased reporting of outcomes in randomized trials [115,116], which serve as the evidence upon which treatment guideline recommendations are based.

In summary, we provide here a critical appraisal of the available evidence regarding the use of aripiprazole for the maintenance treatment of bipolar disorder. The available evidence consists of a single trial by Keck et al. [39,40], which is subject to several substantive methodological limitations but has nonetheless been cited uncritically in the ensuing scientific literature. Several alternative modifications or study designs may improve the probability of generating more useful data from studies in this vulnerable patient population to inform the treatment of similar patients in the future. We are concerned that the publication and apparently uncritical acceptance of this trial may be diverting patients away from more effective treatments.

## Supporting Information

**Table S1** Published studies excluded from review. These five published studies were not included in the review because they were open-label, examined the use of aripiprazole as adjunctive treatment or for acute mania, or lacked sufficient duration. Found at: doi:10.1371/journal.pmed.1000434.s001 (0.03 MB DOC)

**Table S2** Clinical trial registry studies excluded from review. These 12 studies were not included in the review because they were open-label, examined the use of aripiprazole as adjunctive treatment or for acute mania, or lacked sufficient duration. Found at: doi:10.1371/journal.pmed.1000434.s002 (0.04 MB DOC)

**Text S1** Approval package for: 21-436/S-005 & S-008 & 21-713/S-003. Washington (D.C.): Center for Drug Evaluation and Research, U.S. Food and Drug Administration; 2005. This supplemental New Drug Application (sNDA), which provides for the use of aripiprazole as maintenance therapy in bipolar I disorder, was obtained through a U.S. Freedom of Information Act request. Found at: doi:10.1371/journal.pmed.1000434.s003 (4.92 MB PDF)

## Acknowledgments

The authors thank Anne Ludvik of the library service at the San Francisco Veterans Affairs Medical Center, for help in crafting the evidence search protocols and the citation search protocol; five reviewers, for helpful suggestions; and Tom Zamojcin at Thomson Reuters, for providing the Essential Science Indicators data.

## Author Contributions

ICMJE criteria for authorship read and met: ACT NZR JNJ PIP GIS DH. Agree with the manuscript’s results and conclusions: ACT NZR JNJ PIP GIS DH. Designed the experiments/the study: ACT NZR. Analyzed the data: ACT NZR JNJ GIS DH. Collected data/did experiments for the study: ACT NZR. Wrote the first draft of the paper: ACT NZR. Contributed to the writing of the paper: ACT NZR JNJ PIP GIS DH. Contributed to the concept and design of the paper and first draft: PIP.

## References

- Tohen M, Jacobs TG, Feldman PD (2000) Onset of action of antipsychotics in the treatment of mania. *Bipolar Disord* 2: 261–268.
- Wolfsperger M, Greil W, Rossler W, Grohmann R (2007) Pharmacological treatment of acute mania in psychiatric in-patients between 1994 and 2004. *J Affect Disord* 99: 9–17.

3. Healy D (2006) The latest mania: selling bipolar disorder. *PLoS Med* 3: e185. doi:10.1371/journal.pmed.0030185.
4. Malhi GS, Adams D, Berk M (2009) Medicating mood with maintenance in mind: bipolar depression pharmacotherapy. *Bipolar Disord* 11 Suppl 2: 55–76.
5. Spielmans GI, Parry PI (2010) From evidence-based medicine to marketing-based medicine: evidence from internal industry documents. *J Bioeth Inquiry* 7: 13–29.
6. Healy D (2010) From mania to bipolar disorder. Yatham LN, Maj M, eds. *Bipolar disorder: clinical and neurobiological foundations*. Oxford: John Wiley & Sons, Ltd. pp 1–7.
7. Mark TL (2010) For what diagnoses are psychotropic medications being prescribed?: a nationally representative survey of physicians. *CNS Drugs* 24: 319–326.
8. Depp C, Ojeda VD, Mastin W, Unutzer J, Gilmer TP (2008) Trends in use of antipsychotics and mood stabilizers among Medicaid beneficiaries with bipolar disorder, 2001–2004. *Psychiatr Serv* 59: 1169–1174.
9. Frank E, Prien RF, Jarrett RB, Keller MB, Kupfer DJ, et al. (1991) Conceptualization and rationale for consensus definitions of terms in major depressive disorder. Remission, recovery, relapse, and recurrence. *Arch Gen Psychiatry* 48: 851–855.
10. Storum JG, van Zwieten BJ, Vermeulen HD, Wohlfarth T, van den Brink W (2001) Relapse and recurrence prevention in major depression: a critical review of placebo-controlled efficacy studies with special emphasis on methodological issues. *Eur Psychiatry* 16: 327–335.
11. Ghaemi SN, Pardo TB, Hsu DJ (2004) Strategies for preventing the recurrence of bipolar disorder. *J Clin Psychiatry* 65(Suppl 10): 16–23.
12. Goodwin FK, Whitham EA, Ghaemi SN (2011) Relapse prevention in bipolar disorder: have any neuroleptics been shown to be ‘mood stabilizers’? *CNS Drugs*. In press.
13. Sachs GS (1996) Bipolar mood disorder: practical strategies for acute and maintenance phase treatment. *J Clin Psychopharmacol* 16: 32S–47S.
14. Sachs GS, Printz DJ, Kahn DA, Carpenter D, Docherty JP (2000) The expert consensus guideline series: medication treatment of bipolar disorder 2000. *Postgrad Med Spec No*. pp 1–104.
15. Suppes T, Dennehy EB, Hirschfeld RM, Altshuler LL, Bowden CL, et al. (2005) The Texas implementation of medication algorithms: update to the algorithms for treatment of bipolar I disorder. *J Clin Psychiatry* 66: 870–886.
16. Perlis RH, Welge JA, Vornik LA, Hirschfeld RM, Keck PE Jr. (2006) Atypical antipsychotics in the treatment of mania: a meta-analysis of randomized, placebo-controlled trials. *J Clin Psychiatry* 67: 509–516.
17. Scherk H, Pajonk FG, Leucht S (2007) Second-generation antipsychotic agents in the treatment of acute mania: a systematic review and meta-analysis of randomized controlled trials. *Arch Gen Psychiatry* 64: 442–455.
18. Vieta E, Sanchez-Moreno J (2008) Acute and long-term treatment of mania. *Dialogues Clin Neurosci* 10: 165–179.
19. Bauer MS, Mitchner L (2004) What is a “mood stabilizer”? An evidence-based response. *Am J Psychiatry* 161: 3–18.
20. Ghaemi SN (2001) On defining ‘mood stabilizer’. *Bipolar Disord* 3: 154–158.
21. Goodwin FK, Jamison KR (2007) *Manic-depressive illness: bipolar disorders and recurrent depression*. New York: Oxford University Press.
22. Suppes T, Vieta E, Liu S, Brecher M, Paulsson B (2009) Maintenance treatment for patients with bipolar I disorder: results from a north american study of quetiapine in combination with lithium or divalproex (trial 127). *Am J Psychiatry* 166: 476–488.
23. Geddes JR, Goodwin GM, Rendell J, Azorin JM, Cipriani A, et al. (2010) Lithium plus valproate combination therapy versus monotherapy for relapse prevention in bipolar I disorder (BALANCE): a randomised open-label trial. *Lancet* 375: 385–395.
24. Ghaemi SN, Hsu DJ, Thase ME, Jawn SR, Nierenberg AA, et al. (2006) Pharmacological treatment patterns at study entry for the first 500 STEP-BD participants. *Psychiatr Serv* 57: 660–665.
25. Lim PZ, Tunis SL, Edell WS, Jensik SE, Tohen M (2001) Medication prescribing patterns for patients with bipolar I disorder in hospital settings: adherence to published practice guidelines. *Bipolar Disord* 3: 165–173.
26. Frangou S, Raymont V, Bettany D (2002) The Maudsley bipolar disorder project. A survey of psychotropic prescribing patterns in bipolar I disorder. *Bipolar Disord* 4: 378–385.
27. Blanco C, Laje G, Olsson M, Marcus SC, Pincus HA (2002) Trends in the treatment of bipolar disorder by outpatient psychiatrists. *Am J Psychiatry* 159: 1005–1010.
28. Zarate CA Jr., Tohen M, Baraibar G, Kando JC, Mirin J (1995) Prescribing trends of antidepressants in bipolar depression. *J Clin Psychiatry* 56: 260–264.
29. U.S. Food and Drug Administration (2005) Approval package for 21-436/S-005 & S-008 & 21-713/S-003. Rockville (Maryland): U.S. Food and Drug Administration.
30. IMS Health (2010) Top 15 U.S. pharmaceutical products by sales. IMS National Sales Perspectives(TM). Norwalk: IMS Health.
31. Chow ST, von Loesbecke A, Hohenberg KW, Epstein M, Buurma AK (2008) Brands and strategies: atypical antipsychotics. Waltham (Massachusetts): Decision Resources, Inc.
32. Diak I, Mehta H (2008) New Molecular Entity review follow-up: aripiprazole. Rockville (Maryland): U.S. Food and Drug Administration.
33. Cuttler L, Silvers JB, Singh J, Tsai AC, Radcliffe D (2005) Physician decisions to discontinue long-term medications using a two-stage framework: the case of growth hormone therapy. *Med Care* 43: 1185–1193.
34. Levit K, Smith C, Cowan C, Lazenby H, Sensenig A, et al. (2003) Trends in U.S. health care spending, 2001. *Health Aff (Millwood)* 22: 154–164.
35. Bristol-Myers Squibb Company (2010) Clinical trials registry. New York: Bristol Myers Squibb Co.
36. Gidiere S (2006) *The federal information manual*. Chicago: American Bar Association.
37. Moynihan R, Bero L, Ross-Degnan D, Henry D, Lee K, et al. (2000) Coverage by the news media of the benefits and risks of medications. *N Engl J Med* 342: 1645–1650.
38. Fleiss J (1981) *Statistical methods for rates and proportions*. 2nd edition. New York: Wiley.
39. Keck PE, Jr., Calabrese JR, McQuade RD, Carson WH, Carlson BX, et al. (2006) A randomized, double-blind, placebo-controlled 26-week trial of aripiprazole in recently manic patients with bipolar I disorder. *J Clin Psychiatry* 67: 626–637.
40. Keck PE, Jr., Calabrese JR, McIntyre RS, McQuade RD, Carson WH, et al. (2007) Aripiprazole monotherapy for maintenance therapy in bipolar I disorder: a 100-week, double-blind study versus placebo. *J Clin Psychiatry* 68: 1480–1491.
41. Otsuka Pharmaceutical Co., Ltd. (2010) A multicenter, placebo-controlled, double-blind investigative extension trial of the safety and efficacy of aripiprazole in the treatment of patients with bipolar disorder experiencing a manic or mixed episode (NCT00606177). Tokyo: Otsuka Pharmaceutical Co., Ltd.
42. Bristol-Myers Squibb Company (2008) A multicenter, randomized, double-blind, placebo-controlled study of aripiprazole monotherapy in the treatment of acutely manic patients with bipolar I disorder (CN138-135LT). New York: Bristol-Myers Squibb Co.
43. Keck PE, Orsulak PJ, Cutler AJ, Sanchez R, Torbeyns A, et al. (2009) Aripiprazole monotherapy in the treatment of acute bipolar I mania: a randomized, double-blind, placebo- and lithium-controlled study. *J Affect Disord* 112: 36–49.
44. Muzina DJ, Momah C, Eudicone JM, Pikalov A, McQuade RD, et al. (2008) Aripiprazole monotherapy in patients with rapid-cycling bipolar I disorder: an analysis from a long-term, double-blind, placebo-controlled study. *Int J Clin Pract* 62: 679–687.
45. Keck PE, Jr., Marcus R, Tourkodimitris S, Ali M, Liebeskind A, et al. (2003) A placebo-controlled, double-blind study of the efficacy and safety of aripiprazole in patients with acute bipolar mania. *Am J Psychiatry* 160: 1651–1658.
46. He K (2004) Statistical review and evaluation. Center for Drug Evaluation and Research approval package for 21-436/S-005 & S-008 & 21-713/S-003. Rockville (Maryland): U.S. Food and Drug Administration.
47. Bowden CL, Calabrese JR, Sachs G, Yatham LN, Asghar SA, et al. (2003) A placebo-controlled 18-month trial of lamotrigine and lithium maintenance treatment in recently manic or hypomanic patients with bipolar I disorder. *Arch Gen Psychiatry* 60: 392–400.
48. Tohen M, Calabrese JR, Sachs GS, Banov MD, Detke HC, et al. (2006) Randomized, placebo-controlled trial of olanzapine as maintenance therapy in patients with bipolar I disorder responding to acute treatment with olanzapine. *Am J Psychiatry* 163: 247–256.
49. Calabrese JR, Bowden CL, Sachs G, Yatham LN, Behnke K, et al. (2003) A placebo-controlled 18-month trial of lamotrigine and lithium maintenance treatment in recently depressed patients with bipolar I disorder. *J Clin Psychiatry* 64: 1013–1024.
50. Angst J, Sellaro R (2000) Historical perspectives and natural history of bipolar disorder. *Biol Psychiatry* 48: 445–457.
51. Tohen M, Frank E, Bowden CL, Colom F, Ghaemi SN, et al. (2009) The International Society for Bipolar Disorders (ISBD) Task Force report on the nomenclature of course and outcome in bipolar disorders. *Bipolar Disord* 11: 453–473.
52. Ghaemi SN (2010) From BALANCE to DSM-5: taking lithium seriously. *Bipolar Disord* 12: 673–677.
53. Quitkin FM, Rabkin JG (1981) Methodological problems in studies of depressive disorder: utility of the discontinuation design. *J Clin Psychopharmacol* 1: 283–288.
54. Quitkin F, Rifkin A, Klein DF (1976) Prophylaxis of affective disorders. Current status of knowledge. *Arch Gen Psychiatry* 33: 337–341.
55. Prodruchny TA (2004) Clinical review. Center for Drug Evaluation and Research approval package for 21-436/S-005 & S-008 & 21-713/S-003. Rockville (Maryland): U.S. Food and Drug Administration.
56. Ghaemi SN (2006) Hippocratic psychopharmacology for bipolar disorder: an expert’s opinion. *Psychiatry (Edmont)* 3: 30–39.
57. Deshauer D, Fergusson D, Duffy A, Albuquerque J, Grof P (2005) Re-evaluation of randomized control trials of lithium monotherapy: a cohort effect. *Bipolar Disord* 7: 382–387.
58. Smith LA, Cornelius V, Warnock A, Bell A, Young AH (2007) Effectiveness of mood stabilizers and antipsychotics in the maintenance phase of bipolar disorder: a systematic review of randomized controlled trials. *Bipolar Disord* 9: 394–412.
59. Greenhouse JB, Stangl D, Kupfer DJ, Prien RF (1991) Methodologic issues in maintenance therapy clinical trials. *Arch Gen Psychiatry* 48: 313–318.

60. Wehr TA (1990) Unnecessary confusion about opposite findings in two studies of tricyclic treatment of bipolar illness. *Arch Gen Psychiatry* 47: 787–788.
61. Sachs GS, Thase ME (2000) Bipolar disorder therapeutics: maintenance treatment. *Biol Psychiatry* 48: 573–581.
62. Shapiro DR, Quitkin FM, Fleiss JL (1990) Unnecessary confusion about opposite findings in two studies of tricyclic treatment of bipolar illness. Reply. *Arch Gen Psychiatry* 47: 788.
63. Deshauer D, Moher D, Fergusson D, Moher E, Sampson M, et al. (2008) Selective serotonin reuptake inhibitors for unipolar depression: a systematic review of classic long-term randomized controlled trials. *CMAJ* 178: 1293–1301.
64. Levenson M (2008) Antiepileptic drugs and suicidality. Rockville (Maryland): U.S. Food and Drug Administration.
65. Stone M, Laughren T, Jones ML, Levenson M, Holland PC, et al. (2009) Risk of suicidality in clinical trials of antidepressants in adults: analysis of proprietary data submitted to US Food and Drug Administration. *BMJ* 339: b2880.
66. Calabrese JR, Rapport DJ, Shelton MD, Kimmel SE (2001) Evolving methodologies in bipolar disorder maintenance research. *Br J Psychiatry Suppl* 41: s157–163.
67. Calabrese JR, Rapport DJ (1999) Mood stabilizers and the evolution of maintenance study designs in bipolar I disorder. *J Clin Psychiatry* 60(Suppl 5): 5–13; discussion 14–15.
68. Lapierre YD, Gagnon A, Kokkinidis L (1980) Rapid recurrence of mania following lithium withdrawal. *Biol Psychiatry* 15: 859–864.
69. Mander AJ, Loudon JB (1988) Rapid recurrence of mania following abrupt discontinuation of lithium. *Lancet* 2: 15–17.
70. Baldessarini RJ, Suppes T, Tondo L (1996) Lithium withdrawal in bipolar disorder: implications for clinical practice and experimental therapeutics research. *Am J Ther* 3: 492–496.
71. Suppes T, Baldessarini RJ, Faedda GL, Tondo L, Tohen M (1993) Discontinuation of maintenance treatment in bipolar disorder: risks and implications. *Harv Rev Psychiatry* 1: 131–144.
72. Faedda GL, Tondo L, Baldessarini RJ, Suppes T, Tohen M (1993) Outcome after rapid vs gradual discontinuation of lithium treatment in bipolar disorders. *Arch Gen Psychiatry* 50: 448–455.
73. Baldessarini RJ (1995) Risks and implications of interrupting maintenance psychotropic drug therapy. *Psychother Psychosom* 63: 137–141.
74. Baldessarini RJ, Tondo L, Faedda GL, Suppes TR, Floris G, et al. (1996) Effects of the rate of discontinuing lithium maintenance treatment in bipolar disorders. *J Clin Psychiatry* 57: 441–448.
75. Baldessarini RJ, Tondo L, Ghiani C, Lepri B (2010) Illness risk following rapid versus gradual discontinuation of antidepressants. *Am J Psychiatry* 167: 934–941.
76. Suppes T, Baldessarini RJ, Faedda GL, Tohen M (1991) Risk of recurrence following discontinuation of lithium treatment in bipolar disorder. *Arch Gen Psychiatry* 48: 1082–1088.
77. Goodwin GM (1994) Recurrence of mania after lithium withdrawal. Implications for the use of lithium in the treatment of bipolar affective disorder. *Br J Psychiatry* 164: 149–152.
78. Franks MA, Macritchie KA, Mahmood T, Young AH (2008) Bouncing back: is the bipolar rebound phenomenon peculiar to lithium? A retrospective naturalistic study. *J Psychopharmacol* 22: 452–456.
79. Viguera AC, Baldessarini RJ, Hegarty JD, van Kammen DP, Tohen M (1997) Clinical risk following abrupt and gradual withdrawal of maintenance neuroleptic treatment. *Arch Gen Psychiatry* 54: 49–55.
80. Baldessarini RJ, Viguera AC (1998) Medication removal and research in psychotic disorders. *Arch Gen Psychiatry* 55: 281–283.
81. Healy D (2010) Treatment-induced stress syndromes. *Med Hypotheses* 74: 764–768.
82. Geddes JR, Burgess S, Hawton K, Jamison K, Goodwin GM (2004) Long-term lithium therapy for bipolar disorder: systematic review and meta-analysis of randomized controlled trials. *Am J Psychiatry* 161: 217–222.
83. Bowden CL, Calabrese JR, McElroy SL, Gyulai L, Wassef A, et al. (2000) A randomized, placebo-controlled 12-month trial of divalproex and lithium in treatment of outpatients with bipolar I disorder. Divalproex Maintenance Study Group. *Arch Gen Psychiatry* 57: 481–489.
84. Bowden CL, Swann AC, Calabrese JR, McElroy SL, Morris D, et al. (1997) Maintenance clinical trials in bipolar disorder: design implications of the divalproex-lithium-placebo study. *Psychopharmacol Bull* 33: 693–699.
85. Coppen A, Noguera R, Bailey J, Burns BH, Swani MS, et al. (1971) Prophylactic lithium in affective disorders. Controlled trial. *Lancet* 2: 275–279.
86. Prien RF, Caffey EM Jr., Klett CJ (1973) Prophylactic efficacy of lithium carbonate in manic-depressive illness. Report of the Veterans Administration and National Institute of Mental Health collaborative study group. *Arch Gen Psychiatry* 28: 337–341.
87. Kemp DE, Canan F, Goldstein BI, McIntyre RS (2009) Long-acting risperidone: a review of its role in the treatment of bipolar disorder. *Adv Ther* 26: 588–599.
88. Fountoulakis KN, Vieta E (2009) Efficacy and safety of aripiprazole in the treatment of bipolar disorder: a systematic review. *Ann Gen Psychiatry* 8: 16.
89. Muzina DJ (2009) Treatment and prevention of mania in bipolar I disorder: focus on aripiprazole. *Neuropsychiatr Dis Treat* 5: 279–288.
90. McIntyre RS, Woldeyohannes HO, Yasgur BS, Soczynska JK, Miranda A, et al. (2007) Maintenance treatment in bipolar disorder: a focus on aripiprazole. *Expert Rev Neurother* 7: 919–925.
91. McIntyre RS, Soczynska JK, Woldeyohannes HO, Miranda A, Konarski JZ (2007) Aripiprazole: pharmacology and evidence in bipolar disorder. *Expert Opin Pharmacother* 8: 1001–1009.
92. McIntyre RS (2010) Aripiprazole for the maintenance treatment of bipolar I disorder: a review. *Clin Ther* 32(Suppl 1): S32–38.
93. Garcia-Amador M, Pacchiarotti I, Valenti M, Sanchez RF, Goikolea JM, et al. (2006) Role of aripiprazole in treating mood disorders. *Expert Rev Neurother* 6: 1777–1783.
94. Fagiolini A (2008) Practical guidance for prescribing with aripiprazole in bipolar disorder. *Curr Med Res Opin* 24: 2691–2702.
95. Ulusahin A (2008) Ikiuclu bozuklukta aripiprazol [Aripiprazole for the treatment of bipolar disorder]. *Klinik Psikofarmakoloji Bulteni [Bulletin of Clinical Psychopharmacology]* 18: S27–S34.
96. Yatham LN, Kennedy SH, Schaffer A, Parikh SV, Beaulieu S, et al. (2009) Canadian Network for Mood and Anxiety Treatments (CANMAT) and International Society for Bipolar Disorders (ISBD) collaborative update of CANMAT guidelines for the management of patients with bipolar disorder: update 2009. *Bipolar Disord* 11: 225–255.
97. Goodwin GM (2009) Evidence-based guidelines for treating bipolar disorder: revised second edition—recommendations from the British Association for Psychopharmacology. *J Psychopharmacol* 23: 346–388.
98. Forbes A, Findling RL, Nyilas M, Forbes RA, Aurang C, et al. (2008) Long-term efficacy of aripiprazole in pediatric patients with bipolar I disorder. *New Research Abstracts; May 3–8 American Psychiatric Association* 297.
99. Baldessarini RJ, Tohen M, Tondo L (2000) Maintenance treatment in bipolar disorder. *Arch Gen Psychiatry* 57: 490–492.
100. Goodwin GM, Malhi GS (2007) What is a mood stabilizer? *Psychol Med* 37: 609–614.
101. Bowden CL, Calabrese JR, Wallin BA, Swann AC, McElroy SL, et al. (1995) Illness characteristics of patients in clinical drug studies of mania. *Psychopharmacol Bull* 31: 103–109.
102. Post RM, Keck P, Jr., Rush AJ (2002) New designs for studies of the prophylaxis of bipolar disorder. *J Clin Psychopharmacol* 22: 1–3.
103. Prien RF, Kupfer DJ (1989) Outside analysis of a multicenter collaborative study. *Arch Gen Psychiatry* 46: 462–464.
104. Tohen M, Lin D (2006) Maintenance treatment in bipolar disorder. *Psychiatry (Edgmont)* 3: 43–45.
105. Swann AC (2006) Treating bipolar disorder: for the patient or against the illness? *Psychiatry (Edgmont)* 3: 40–42.
106. Mallinckrodt C, Chuang-Stein C, McSorley P, Schwartz J, Archibald DG, et al. (2007) A case study comparing a randomized withdrawal trial and a double-blind long-term trial for assessing the long-term efficacy of an antidepressant. *Pharm Stat* 6: 9–22.
107. Amery W, Dony J (1975) A clinical trial design avoiding undue placebo treatment. *J Clin Pharmacol* 15: 674–679.
108. Temple R (1989) Government viewpoint of clinical trials of cardiovascular drugs. *Med Clin North Am* 73: 495–509.
109. Peselow ED, Fieve RR, Difiglia C, Sanfilippo MP (1994) Lithium prophylaxis of bipolar illness. The value of combination treatment. *Br J Psychiatry* 164: 208–214.
110. Ghaemi SN (2008) Toward a Hippocratic psychopharmacology. *Can J Psychiatry* 53: 189–196.
111. Carey TS, Williams JW, Jr., Oldham JM, Goodman F, Ranney LM, et al. (2008) Gabapentin in the treatment of mental illness: the echo chamber of the case series. *J Psychiatr Pract* 14(Suppl 1): 15–27.
112. Choudhry NK, Stelfox HT, Detsky AS (2002) Relationships between authors of clinical practice guidelines and the pharmaceutical industry. *JAMA* 287: 612–617.
113. Stelfox HT, Chua G, O'Rourke K, Detsky AS (1998) Conflict of interest in the debate over calcium-channel antagonists. *N Engl J Med* 338: 101–106.
114. Abramson J, Starfield B (2005) The effect of conflict of interest on biomedical research and clinical practice guidelines: can we trust the evidence in evidence-based medicine? *J Am Board Fam Pract* 18: 414–418.
115. Rising K, Bacchetti P, Bero L (2008) Reporting bias in drug trials submitted to the Food and Drug Administration: review of publication and presentation. *PLoS Med* 5: e217; discussion e217. doi:10.1371/journal.pmed.0050217.
116. Lexchin J, Bero LA, Djulbegovic B, Clark O (2003) Pharmaceutical industry sponsorship and research outcome and quality: systematic review. *BMJ* 326: 1167–1170.

## Editors' Summary

**Background.** Bipolar disorder (manic depression) is a serious, long-term mental illness that affects about 1% of adults at some time during their life. It usually develops in late adolescence or early adulthood and affects men and women from all backgrounds. People with bipolar disorder experience wild mood swings that interfere with daily life and damage relationships. During “manic” episodes, which can last several months if untreated, they may feel euphoric (“high”), energetic, or irritable. They may be full of ambitious plans, feel creative, and spend money recklessly. They can also have psychotic symptoms—they may see or hear things that are not there. During depressive episodes, affected individuals may feel helpless, worthless, and suicidal. Treatments for bipolar disorder include drugs to stabilize mood swings (for example, lithium and anticonvulsant medications), antidepressants to treat depressive episodes, and antipsychotic drugs to treat manic episodes. Psychotherapy can also help and patients can be taught to recognize the signs of approaching manic or depressive episodes and the triggers for these episodes.

**Why Was This Study Done?** Treatment of bipolar disorder is divided into three phases: acute treatment lasting about 2 months to achieve remission, continuance treatment lasting from months 2 through 6 to prevent relapse, and long-term maintenance treatment to prevent recurrence. Second-generation (atypical) antipsychotics are widely used for acute treatment of manic episodes but are also used for maintenance treatment. For example, the atypical antipsychotic aripiprazole, which gained US approval for this indication in 2005, is now a popular choice among clinicians for treating bipolar disorder. But how much evidence is there to support aripiprazole's use in the maintenance treatment of bipolar disorder? Here, the researchers systematically search the published literature for double-blind randomized controlled trials of aripiprazole for this indication, critically analyze the quality of these trials, and undertake a citation search to investigate how the results of these trials have been disseminated in the scientific literature. In double-blind randomized controlled trials, patients are randomly assigned to receive a test drug or a control (generally, placebo), and the effects of these drugs compared; patients in the trial, and physicians administering treatments, would not know who is receiving the test drug or control until the trial is completed.

**What Did the Researchers Do and Find?** The researchers' search for reports of double-blind randomized controlled trials of aripiprazole for the maintenance

treatment of bipolar disorder using predefined criteria identified only two publications, both describing a single trial—the Keck trial. Critical review of this trial identified four issues that limit its interpretation for supporting aripiprazole as a maintenance therapy: the trial was too short to demonstrate maintenance efficacy; all the trial participants had responded well to aripiprazole as an acute treatment so the generalizability of the trial's results was limited; the trial design meant that some of the apparent beneficial treatment results could have reflected the adverse effects of abrupt medication discontinuation in the control group; and the trial had a low completion rate. The researchers' citation search identified 80 publications that cited the Keck trial in discussions of the use of aripiprazole for maintenance treatment of bipolar disorder. Only a quarter of these papers presented any numerical data from the trial, only a third mentioned any of the reported adverse events, and only four papers mentioned the trial's limitations.

**What Do These Findings Mean?** This evaluation of the evidence base supporting the use of aripiprazole for the maintenance treatment of bipolar disorder shows that the justification for this practice relies on the results of one published trial. Moreover, the methodology and reporting of this trial mean that its results cannot easily be generalized to inform the treatment of most patients with bipolar disorder. Worryingly, the researchers' citation search indicates that the Keck trial has been cited uncritically in the ensuing scientific literature. Although the unique features of bipolar disorder make it hard to undertake controlled studies of treatment options, the researchers express concern that “the publication and apparently uncritical acceptance of this trial may be diverting patients away from more effective treatments”.

**Additional Information** Please access these websites via the online version of this summary at <http://dx.doi.org/10.1371/journal.pmed.1000434>.

- The US National Institute of Mental Health has detailed information on bipolar disorder, including an Easy to Read booklet (in English and Spanish)
- The UK National Health Service Choices website provides information on all aspects of bipolar disorder
- The UK charity Mind has information on bipolar disorder and provides links to other useful organizations
- MedlinePlus has links to further information on ><bipolar disorder (in English and Spanish)
